# Supplementary material
Source: publisher site journal article supplement (https://www.dovepress.com/get_supplementary_file.php?f=278928.docx)
Supplement: Supplementary file 1 [file get_supplementary_file.php]

**Appendix I: Approximate calorific value of some cooked food preparations**28

| **Preparation** | | **Quantity for one serving** | **Calories (Kcal)** |
| --- | --- | --- | --- |
| **Cereals** | | | |
| Rice | | 1 cup | 170 |
| Phulka | | 1 No. | 80 |
| Parantha | | 1 No. | 150 |
| Puri | | 1 No. | 80 |
| Bread | | 2 slices | 170 |
| Poha | | 1 cup | 270 |
| Upma | | 1 cup | 270 |
| Idli | | 2 Nos | 150 |
| Dosa | | 1 No. | 125 |
| Khichidi | | 1 cup | 200 |
| Wheat porridge | | 1 cup | 220 |
| Semolina porridge | | 1 cup | 220 |
| Cereal flaks with milk (corn/wheat/rice) | | 1 cup | 220 |
| **Pulse** | | | |
| Plain dhal | 1/2 cup | | 100 |
| Sambher | 1 cup | | 110 |
| **Vegetable** | | | |
| With gravy | 1 cup | | 170 |
| Dry | 1 cup | | 150 |
| **Non-Vegetarian** | | | |
| Boiled egg | 1 No. | | 90 |
| Omelet | 1 No. | | 160 |
| Fried egg | 1 No. | | 160 |
| Mutton curry | 14 cup | | 260 |
| Chicken curry | 3/4 cup | | 240 |
| Fish fry | 2 big pieces | | 190 |
| Fish cutlet | 2 Nos | | 190 |
| Prawn curry | 3/4 cup | | 220 |
| Keema kofta curry | 3/4 cup (6 small kebabs) | | 240 |
| Savoury snacks | | | |
| Bajji or pakora | 8 Nos | | 280 |
| Besan ka pura | 1 No | | 220 |
| Chat (dahi-pakora) | 5 pieces | | 220 |
| Cheese balls | 2 Nos | | 250 |
| Dahi vada | 2 Nos | | 180 |
| Vada | 2 Nos | | 140 |
| Masala vada | 2 Nos | | 150 |
| Masala dosa | 1 No | | 200 |
| Pea kachori | 2 Nos | | 380 |
| Sago vada | 2 Nos | | 210 |
| Samosa | 1 No | | 200 |
| Sandwiches (butter 2 tsp) | 2 Nos | | 200 |
| Vegetable puff | 1 No | | 200 |
| Pizza (cheese and tomato) | 1 slice | | 200 |
| Chutneys | | | |
| Coconut/groundnut/til | 2 tbsp | | 120 |
| Tomato | 1 tbsp | | 10 |
| Tamarind (with jiggery) | 1 tbsp | | 60 |
| Sweets and desserts | | | |
| Besan barfi | 2 small pieces | | 400 |
| Chikki | 2 pieces | | 290 |
| Fruit cake | 1 piece | | 270 |
| Rice puttu | 1/2 cup | | 280 |
| Sandesh | 2 Nos | | 140 |
| Halwa (kesari) | 1/2 cup | | 280 |
| Jelly/jam | 1 tbsp | | 20 |
| Custard (caramel) | 1/2 cup | | 160 |
| Srikhand | 1/2 cup | | 380 |
| Milk chocolate | 25 g | | 140 |
| Ice cream | 1/2 cup | | 200 |
| **Beverages** | | | |
| Tea (2 tsp sugar + 50 ml toned milk) | 1 cup | | 75 |
| Coffee ((2 tsp sugar + 100 ml) | 1 cup | | 110 |
| Cow’s milk (2 tsp sugar) | 1 cup | | 180 |
| Buffalo’s milk (2 tsp sugar) | 1 cup | | 320 |
| Lassi (2 tsp sugar) | 1 cup/glass (200 ml) | | 110 |
| Squash | 1 cup/glass | | 75 |
| Syrups (sharbats) | 1 cup/glass | | 200 |
| Cold drinks | 1 bottle (200 ml) | | 150 |
| Fresh lime juice | 1 glass | | 60 |

Abbreviations: g: grams; ml: milliliters; tbsp: table spoon; tsp: tea spoon
